# Supplementary material for: Fast and accurate low-dimensional reduction of biophysically detailed neuron models
Source: PubMed Central journal article supplement — Sci Rep. 2012 Dec 5;2:928. doi: 10.1038/srep00928 (PMC3514644; doi:10.1038/srep00928), 2012-12-05

*Fast and accurate low-dimensional reduction of biophysically detailed neuron models*  
by A. Marasco, A. Limongiello, and M. Migliore

Supplementary Figure 1

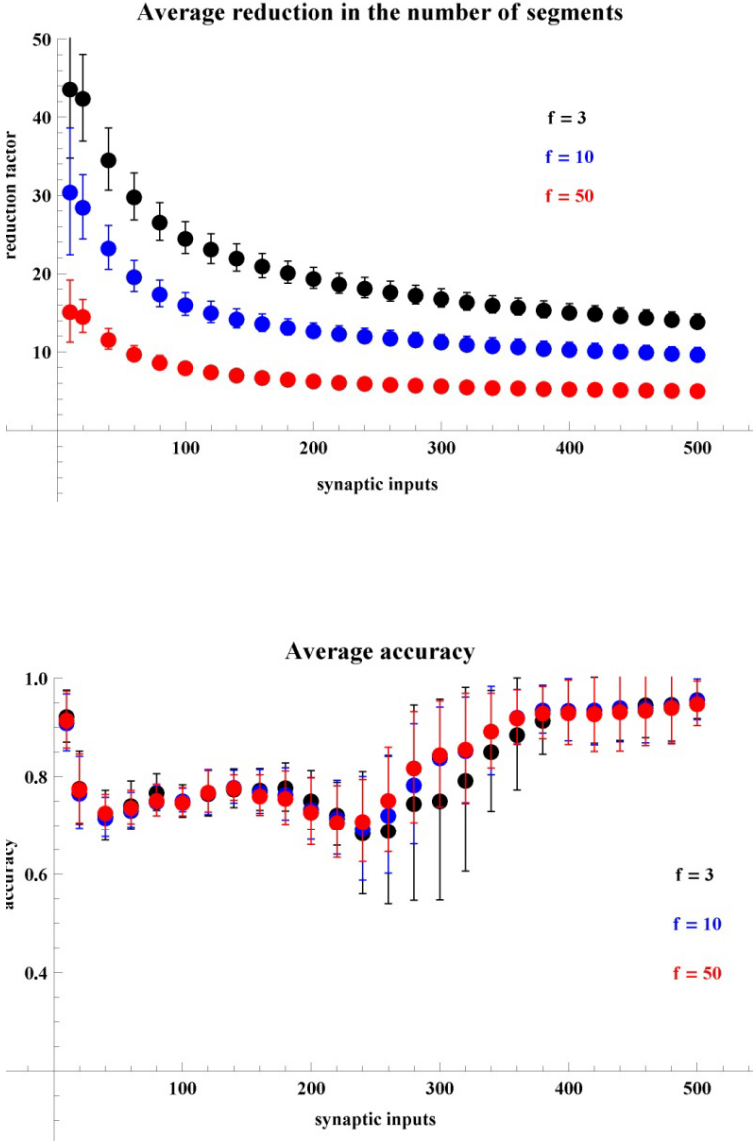

Supplement: srep00928-s1.pdf [file srep00928-s1.pdf]
